# Supplementary material for: In vitro potency of xeruborbactam in combination with multiple β-lactam antibiotics in comparison with other β-lactam/β-lactamase inhibitor (BLI) combinations against carbapenem-resistant and extended-spectrum β-lactamase-producing Enterobacterales
Source: PubMed Central journal article supplement (PMC10648875; doi:10.1128/aac.00440-23), 2023-10-06

## Supplementary Tables

**Table S1. In vitro potency of xeruborbactam and taniborbactam combinations against CLSI approved quality control strains**

| Reference strain/antimicrobial agents                     | MIC ( $\mu\text{g/ml}$ ) (number of observations) | CLSI approved MIC range ( $\mu\text{g/ml}$ ) |
|-----------------------------------------------------------|---------------------------------------------------|----------------------------------------------|
| <b><i>Escherichia coli</i> NCTC 13353 (CTX-M-15)</b>      |                                                   |                                              |
| Cefepime                                                  | 32 (1)-64(5)->128 (10)                            | >64                                          |
| Cefepime-taniborbactam (4)                                | 0.125 (13) - 0.25 (4)                             | 0.125/4-1/4                                  |
| Cefepime-xeruborbactam (4)                                | $\leq 0.03$ (16)                                  | NA                                           |
| Cefepime-xeruborbactam (8)                                | $\leq 0.03$ (16)                                  | NA                                           |
| Xeruborbactam                                             | 4 (1) - 8 (8) - 16 (2)                            | NA                                           |
| <b><i>Klebsiella pneumoniae</i> ATCC 700603 (SHV-18)</b>  |                                                   |                                              |
| Cefepime                                                  | 0.5(1)-1(8)-2(1)-4(1)                             | 0.5-2                                        |
| Cefepime-taniborbactam (4)                                | 0.25 (11)                                         | 0.125/4-0.5/4                                |
| Cefepime-xeruborbactam (4)                                | $\leq 0.03$ (5)-0.06 (5)-0.125 (1)                | NA                                           |
| Cefepime-xeruborbactam (8)                                | $\leq 0.03$ (10)-0.06 (1)                         | NA                                           |
| Xeruborbactam                                             | 8 (7)-16 (4)                                      | NA                                           |
| <b><i>Klebsiella pneumoniae</i> ATCC BAA-1705 (KPC-2)</b> |                                                   |                                              |
| Cefepime                                                  | 32 (40)->32(6)                                    | NA                                           |
| Cefepime-taniborbactam (4)                                | 0.125 (26)-0.25 (14)- 0.5 (6)                     | 0.125/4-1/4                                  |
| Cefepime-xeruborbactam (4)                                | 0.03 (8)-0.06 (36)-0.125 (4)                      | NA                                           |
| Cefepime-xeruborbactam (8)                                | $\leq 0.015$ (22)-0.03 (20)-0.06 (2)-0.125 (2)    | NA                                           |
| Meropenem                                                 | 8 (2)-16 (16)-32 (28)                             | 8.0-64                                       |
| Meropenem-xeruborbactam (4)                               | $\leq 0.015$ (46)                                 | NA                                           |
| Meropenem-xeruborbactam (8)                               | $\leq 0.015$ (46)                                 | NA                                           |
| Xeruborbactam                                             | 8 (2)-16 (44)-32 (2)                              | NA                                           |
| <b><i>Klebsiella pneumoniae</i> ATCC BAA-2814 (KPC-3)</b> |                                                   |                                              |
| Cefepime                                                  | >32 (61)                                          | NA                                           |
| Cefepime-taniborbactam (4)                                | 0.5 (16) - 1 (43)-2 (2)                           | NA                                           |
| Cefepime-xeruborbactam (4)                                | 0.125 (8)-0.25 (54)-0.5 (3)                       | NA                                           |
| Cefepime-xeruborbactam (8)                                | $\leq 0.03$ (8)-0.06 (8)-0.125 (38)-0.5 (2)       | NA                                           |
| Meropenem                                                 | >32 (56)                                          | 32-256                                       |
| Meropenem-xeruborbactam (4)                               | $\leq 0.03$ (4)-0.06 (8)-0.125 (44)               | 0.03/4-0.125/4                               |
| Meropenem-xeruborbactam (8)                               | $\leq 0.03$ (28)-0.06 (48)                        | 0.015/8-0.06/8                               |
| Xeruborbactam                                             | 16 (20)-32 (28)                                   | NA                                           |

|                                                            |                   |          |
|------------------------------------------------------------|-------------------|----------|
| <b><i>Pseudomonas aeruginosa</i> ATCC BAA-3197 (KPC-2)</b> |                   |          |
| Cefepime                                                   | >128 (16)         | NA       |
| Cefepime-taniborbactam (4)                                 | 4(1)-8 (15)       | NA       |
| Cefepime-xeruborbactam (4)                                 | 4 (15)-8 (1)      | NA       |
| Cefepime-xeruborbactam (8)                                 | 4 (16)            | NA       |
| Meropenem                                                  | >128 (14)         | 128-1024 |
| Meropenem-xeruborbactam (4)                                | 2(12)-4(1)-8(1)   | NA       |
| Meropenem-xeruborbactam (8)                                | 1 (3)-2(10)-4(1)  | 1/8-4/8  |
| Xeruborbactam                                              | 64 (1)- >128 (13) | NA       |

**Table S2. Carbapenem-resistant surveillance isolates of *Enterobacterales* used in this study\***

| Organism/<br>beta-lactamase type            | Serine beta-lactamases |     |               |             |            | Metallo beta-lactamases |      |     |
|---------------------------------------------|------------------------|-----|---------------|-------------|------------|-------------------------|------|-----|
|                                             | Total                  | KPC | Other class A | OXA-48-like | Non-CP CRE | NDM                     | VIM  | IMP |
| <i>Citrobacter amalonaticus / farmeri</i>   | 1                      | 1   |               |             |            |                         |      |     |
| <i>Citrobacter freundii</i> species complex | 7                      | 3   |               | 2           | 1          | 1                       |      |     |
| <i>Enterobacter aerogenes</i>               | 11                     | 3   |               |             | 8          |                         |      |     |
| <i>Enterobacter cloacae</i> species complex | 85                     | 26  | 1 (IMI)       | 8           | 10         | 34                      | 6    |     |
| <i>Enterobacter hormaechei</i>              | 2                      | 1   |               |             |            | 1                       |      |     |
| <i>Escherichia coli</i>                     | 55                     | 12  |               | 7           | 11         | 24                      | 1    |     |
| <i>Klebsiella aerogenes</i>                 | 4                      |     |               |             | 4          |                         |      |     |
| <i>Klebsiella oxytoca</i>                   | 26                     | 14  |               |             | 1          | 9                       | 1    | 1   |
| <i>Klebsiella pneumoniae</i>                | 806                    | 297 | 2             | 217         | 63         | 214**                   | 12** | 1   |
| <i>Proteus mirabilis</i>                    | 6                      |     |               |             | 1          | 3                       |      | 2   |
| <i>Providencia stuartii</i>                 | 1                      |     |               |             |            |                         | 1    |     |
| <i>Raoultella ornithinolytica</i>           | 1                      | 1   |               |             |            |                         |      |     |
| <i>Serratia marcescens</i>                  | 22                     | 3   | 5 (SME-4)     | 13          |            | 1                       |      |     |
| Total                                       | 1027                   | 261 | 8             | 247         | 99         | 287                     | 21   | 4   |

\* The majority of strains that produced serine carbapenemases or metallo beta-lactamases also co-produced other beta-lactamases.

\*\*Eight NDM- and five VIM-producing strains of *K. pneumoniae* also produced KPC beta-lactamase; one strain of *K. pneumoniae* produced both NDM and VIM MBLs.

**Table S3. Carbapenemases identified in the surveillance panel of *Enterobacteriales***

| Class A type | Number | Class D type | Number | NDM type | Number | VIM type | Number | IMP type | Number |
|--------------|--------|--------------|--------|----------|--------|----------|--------|----------|--------|
| KPC-2        | 192    | OXA-48       | 217    | NDM-1    | 222    | VIM-1    | 17     | IMP-1    | 1      |
| KPC-3        | 168    | OXA-163      | 1      | NDM-4    | 7      | VIM-12   | 1      | IMP-4    | 1      |
| KPC-4        | 1      | OXA-181      | 4      | NDM-5    | 33     | VIM-19   | 3      | IMP-27   | 1      |
| KPC-6        | 2      | OXA-232      | 25     | NDM-7    | 23     |          |        | IMP-64   | 1      |
| IMI          | 1      |              |        | NDM-9    | 2      |          |        |          |        |
| SME-2        | 1      |              |        |          |        |          |        |          |        |
| SME-4        | 4      |              |        |          |        |          |        |          |        |
| Total        | 369    |              | 247    |          | 287    |          | 21     |          | 4      |

**Table S4. In vitro potencies of meropenem alone and combined with xeruborbactam at 4 µg/ml and 8 µg/ml and comparator BLI combination agents against surveillance carbapenem-resistant strains of *Enterobacteriales* with xeruborbactam MIC > 8 µg/mL by the carbapenemase present**

|                   | MEM          | MEM+XER at 4 µg/ml | MEM+XER at 8 µg/ml | FEP | FEP+TAN at 4 µg/ml | CAZ+AVI at 4 µg/ml |
|-------------------|--------------|--------------------|--------------------|-----|--------------------|--------------------|
| <b>ALL</b>        | <b>N=891</b> |                    |                    |     |                    |                    |
| MIC <sub>50</sub> | 32           | 0.06               | ≤0.03              | >32 | 1                  | 1                  |
| MIC <sub>90</sub> | >32          | 0.5                | 0.25               | >32 | 8                  | 32                 |
| <b>no MBL</b>     | <b>N=634</b> |                    |                    |     |                    |                    |
| MIC <sub>50</sub> | 16           | 0.06               | ≤0.03              | >32 | 1                  | 1                  |
| MIC <sub>90</sub> | >32          | 0.25               | 0.25               | >32 | 4                  | 2                  |
| <b>KPC</b>        | <b>N=307</b> |                    |                    |     |                    |                    |
| MIC <sub>50</sub> | 32           | 0.06               | ≤0.03              | >32 | 0.25               | 1                  |
| MIC <sub>90</sub> | >32          | 0.125              | 0.125              | >32 | 2                  | 4                  |
| <b>OXA-48</b>     | <b>N=231</b> |                    |                    |     |                    |                    |
| MIC <sub>50</sub> | 32           | 0.06               | 0.06               | >32 | 1                  | 1                  |
| MIC <sub>90</sub> | >32          | 0.125              | 0.125              | >32 | 4                  | 2                  |
| <b>non-CP CRE</b> | <b>N=96</b>  |                    |                    |     |                    |                    |
| MIC <sub>50</sub> | 8            | 0.25               | 0.125              | >32 | 2                  | 1                  |
| MIC <sub>90</sub> | 16           | 1                  | 0.5                | >32 | 8                  | 4                  |
| <b>MBL</b>        | <b>N=257</b> |                    |                    |     |                    |                    |
| MIC <sub>50</sub> | >32          | 0.06               | ≤0.03              | >32 | 2                  | >32                |
| MIC <sub>90</sub> | >32          | 8                  | 2                  | >32 | 32                 | >32                |
| <b>NDM</b>        | <b>N=232</b> |                    |                    |     |                    |                    |
| MIC <sub>50</sub> | >32          | 0.06               | ≤0.03              | >32 | 2                  | >32                |
| MIC <sub>90</sub> | >32          | 8                  | 2                  | >32 | 32                 | >32                |
| <b>VIM</b>        | <b>N=20</b>  |                    |                    |     |                    |                    |
| MIC <sub>50</sub> | >32          | ≤0.03              | ≤0.03              | >32 | 0.5                | >32                |
| MIC <sub>90</sub> | >32          | 0.5                | 0.06               | >32 | 4                  | >32                |

Abbreviations: MEM, meropenem; FEP, cefepime; CAZ, ceftazidime; XER, xeruborbactam; TAN, taniborbactam; AVI, avibactam

**FIGURES**

**Supplementary Figure S1. Distribution of Xeruborbactam MIC in Carbapenem-Resistant *Enterobacteriales* (N=1027) (A) and meropenem-xeruborbactam (4 µg/mL) MIC in strains with xeruborbactam MIC ≤ 8 µg/mL (N=136; 13.3%) (B)**

**A.**

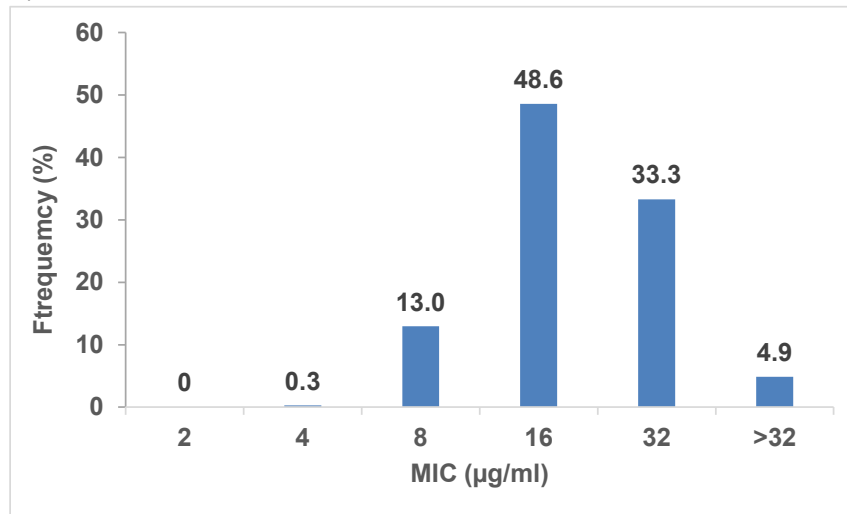

**B.**

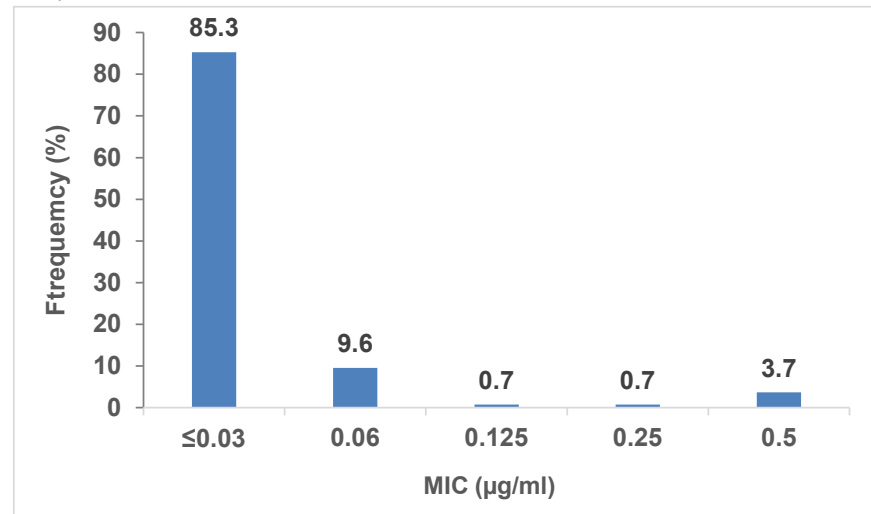

Supplement: aac.00440-23-s0001.pdf [file aac.00440-23-s0001.pdf]
